# Supplementary material for: A sensitive sandwich structure time-resolved fluorescence method for thrombin detection
Source: Royal Society of Chemistry journal article supplement (doi:10.1039/c8ay01135d), 2018-01-01
Supplement: c8ay01135d1.pdf [file c8ay01135d1.pdf]

## Supplementary Information

### A sensitive sandwich structures time-resolved fluorescence method for thrombin detection

Tao Wu, Yuanfu Zhang,\* Tingting Hou, Yinghong Zhang, and Shuhao Wang\*

Shandong Provincial Key Laboratory of Chemical Energy Storage and Novel Cell Technology,  
School of Chemistry and Chemical Engineering, Liaocheng University, Liaocheng 252000, China.

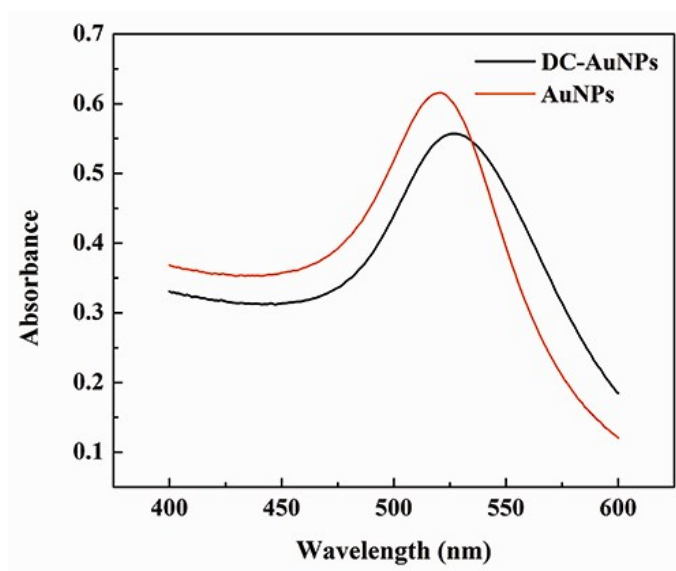

Fig. S1. The UV-vis spectra of AuNPs and DC-AuNPs.

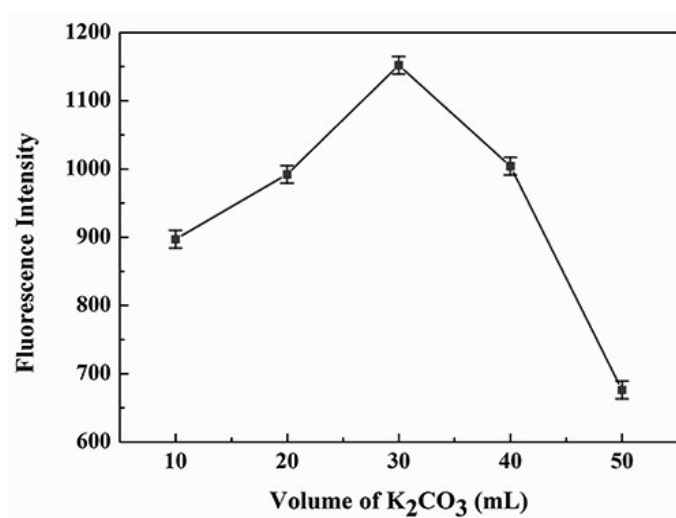

Fig. S2. The effect of the concentration  $K_2CO_3$

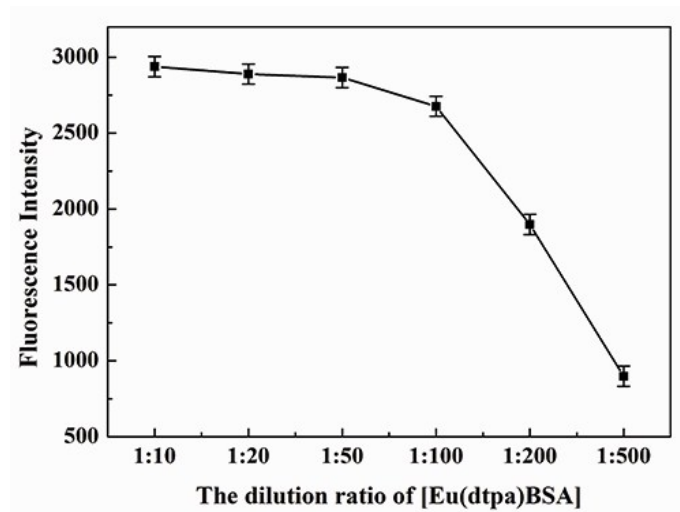

Fig. S3. The effect of the concentration of [Eu(dtpa)(BSA)].

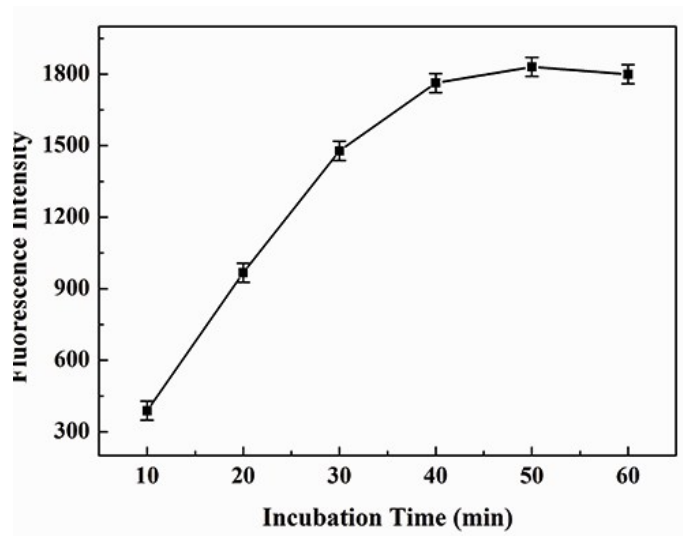

Fig. S4. The effect of the incubation time on the assay

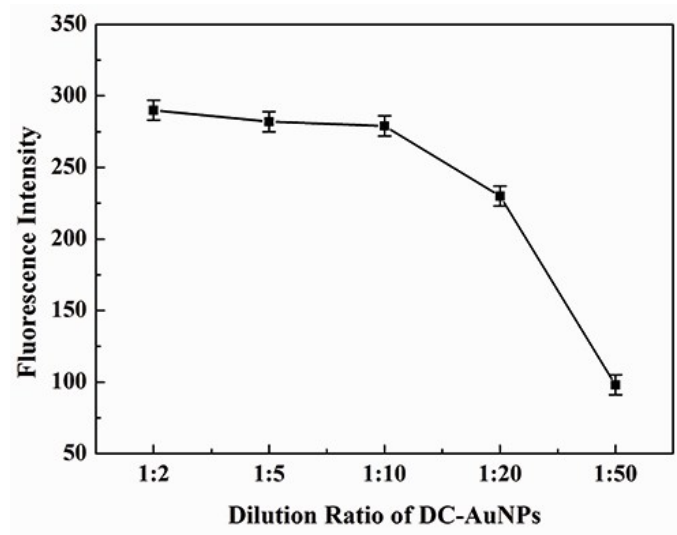

Fig. S5. The effect of the dilution ratio of DC-AuNPs.

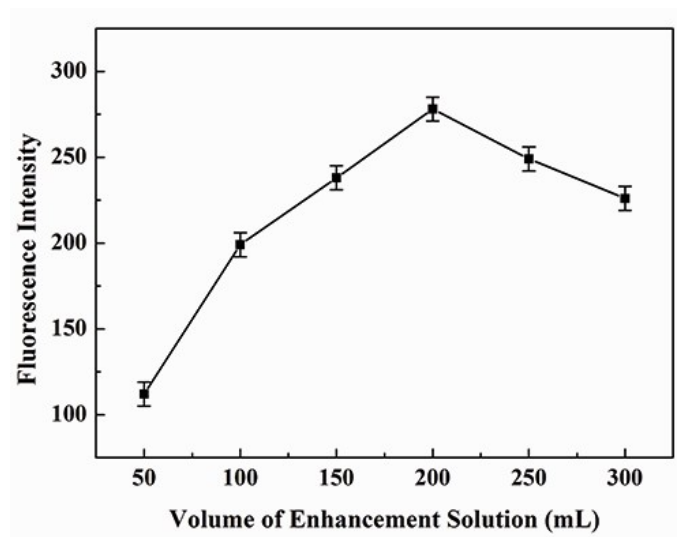

Fig. S6. The effect the amount of enhancement solution

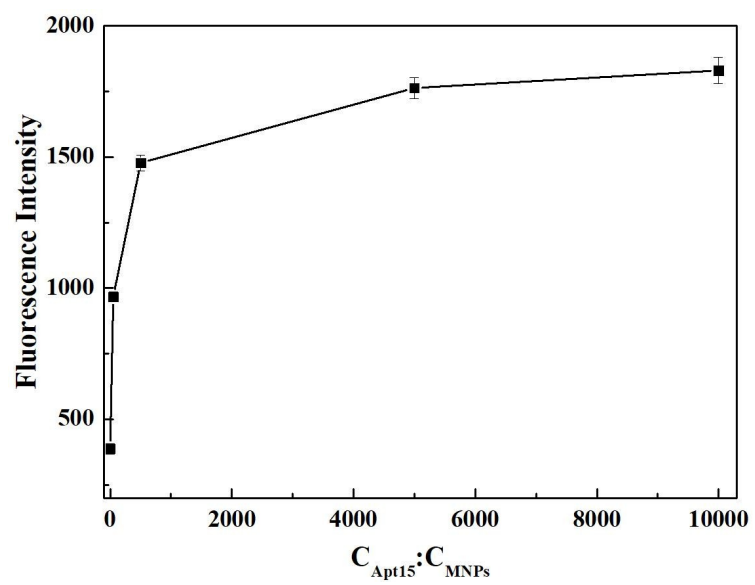

Fig. S7. The effect the ratio of  $C_{Apt15}$  to  $C_{MNPs}$
